# Supplementary material
Source: ML conference proceedings conference paper supplement (https://openaccess.thecvf.com/content/ICCV2021/html/Cui_Learnable_Boundary_Guided_ICCV_2021_paper.html)
Supplement: Supplementary file 1 [file Cui_Learnable_Boundary_Guided_ICCV_2021_supplemental.pdf]

# Learnable Boundary Guided Adversarial Training

## Supplementary Material

### A. Robustness under Black-box attack

Table 7: Comparison of our method with previous defense models under black-box attack on CIFAR-100 and CIFAR-10. To rule out randomness, the numbers are averaged over 2 independently trained models.  $Acc_n$  represents accuracy on natural images.  $BAcc_r$  represents robustness under black-box attack.  $WAcc_r$  represents robustness under white-box attack

| Target Models                 | $BAcc_r$      | $WAcc_r$      | $Acc_n$       | Source Models               | Dataset   |
|-------------------------------|---------------|---------------|---------------|-----------------------------|-----------|
| TRADES ( $\alpha = 1$ )       | 61.29%        | 25.31%        | 62.37%        | Natural                     | CIFAR-100 |
| TRADES ( $\alpha = 6$ )       | 55.52%        | 30.93%        | 56.51%        | Natural                     | CIFAR-100 |
| LBGAT+ALP                     | 61.38%        | <b>35.25%</b> | 62.67%        | Natural                     | CIFAR100  |
| LBGAT+TRADES ( $\alpha=0$ )   | <b>68.35%</b> | <b>33.01%</b> | <b>70.03%</b> | Natural                     | CIFAR-100 |
| TRADES ( $\alpha = 1$ )       | 42.32%        | 25.31%        | 62.37%        | LBGAT+TRADES ( $\alpha=0$ ) | CIFAR-100 |
| TRADES ( $\alpha = 6$ )       | 41.67%        | 30.93%        | 56.51%        | LBGAT+TRADES ( $\alpha=0$ ) | CIFAR-100 |
| LBGAT+ALP                     | 45.68%        | <b>35.25%</b> | 62.67%        | TRADES ( $\alpha = 6$ )     | CIFAR-100 |
| LBGAT+TRADES ( $\alpha=0$ )   | <b>50.27%</b> | <b>33.01%</b> | <b>70.03%</b> | TRADES ( $\alpha = 6$ )     | CIFAR-100 |
| TRADES ( $\alpha = 1$ )       | 87.00%        | 49.14%        | <b>88.64%</b> | Natural                     | CIFAR-10  |
| TRADES ( $\alpha = 6$ )       | 83.30%        | 56.61%        | 84.92%        | Natural                     | CIFAR-10  |
| LBGAT+TRADES ( $\alpha = 0$ ) | <b>87.20%</b> | <b>57.55%</b> | <b>88.22%</b> | Natural                     | CIFAR-10  |
| TRADES ( $\alpha = 1$ )       | 66.18%        | 49.14%        | <b>88.64%</b> | LBGAT+TRADES( $\alpha=0$ )  | CIFAR-10  |
| TRADES ( $\alpha = 6$ )       | 67.18%        | 56.61%        | 84.92%        | LBGAT+TRADES ( $\alpha=0$ ) | CIFAR-10  |
| LBGAT+TRADES ( $\alpha = 0$ ) | <b>68.45%</b> | <b>57.55%</b> | <b>88.22%</b> | TRADES ( $\alpha=6$ )       | CIFAR-10  |

### B. Our Method Creates New SOTA Under the Strongest Auto-Attack on CIFAR-100

To further show the effectiveness of our method, we compare with more previous works. The experimental results are shown in Table 8. On the more challenging CIFAR-100 dataset, our method creates a new state-of-the-art (SOTA) on both robustness and natural accuracy. Specifically, our LBGAT ( $\alpha = 0$ ) model with WideResNet-34-10 architecture significantly outperforms previous SOAT method [6] by 7.08% in the aspect of performance on natural data. Meanwhile, our method surpasses it with respect to model robustness. Further, our strongest model LBGAT ( $\alpha = 6$ ) with WideResNet-34-10 architecture enjoys 2.4% higher robustness than [6].

Moreover, It is worthy to note that our LBGAT ( $\alpha = 6$ ) model achieves even strong robustness than the model, by Hendrycks *et al.* [18], pre-trained on full ImageNet. At the same time, we also surpasses it in the aspect of natural accuracy.

Table 8: More comparisons under the strongest Auto-Attack on CIFAR-100 dataset. "†" denotes numbers are directly copied from [10]. "\*" denotes that the method has used additional unlabeled data.

| Methods                         | Model            | Acc <sub>n</sub> | Acc <sub>r</sub> |
|---------------------------------|------------------|------------------|------------------|
| LBGAT ( $\alpha = 0$ ) Ours     | WideResNet-34-20 | <b>71.00%</b>    | <b>27.66%</b>    |
| LBGAT ( $\alpha = 6$ ) Ours     | WideResNet-34-20 | 62.55%           | <b>30.20%</b>    |
| LBGAT ( $\alpha = 0$ ) Ours     | WideResNet-34-10 | <b>70.03%</b>    | <b>27.05%</b>    |
| LBGAT ( $\alpha = 6$ ) Ours     | WideResNet-34-10 | 60.43%           | 29.34%           |
| TRADES ( $\alpha = 1$ ) [56]    | WideResNet-34-10 | 62.37%           | 22.24%           |
| TRADES ( $\alpha = 6$ ) [56]    | WideResNet-34-10 | 56.50%           | 26.87%           |
| Sitawarin <i>et al.</i> [38] †  | WideResNet-34-10 | 62.82%           | 24.57%           |
| Chen <i>et al.</i> [6] †        | WideResNet-34-10 | 62.15%           | 26.94%           |
| Hendrycks <i>et al.</i> [18] †* | WideResNet-28-10 | 59.23%           | 28.42%           |
| Rice <i>et al.</i> [33] †       | ResNet-18        | 53.83%           | 18.95%           |

### C. More Comparisons Under the Strongest Auto-Attack on CIFAR-10

We also compare with more previous methods on CIFAR-10 dataset. The experimental results are summarized in Table 9. Our LBGAT ( $\alpha = 0$ ) model with WideResNet-34-10 architecture can consistently enjoy higher natural performance while keeping the strongest robustness. We observe that though many fast adversarial training methods, like [45, 35] are proposed to accelerate the training process, their performance are usually unsatisfied.

Table 9: More comparisons under the strongest Auto-Attack on CIFAR-10 dataset. "†" denotes numbers are directly copied from [10]. "\*" denotes the methods aiming to accelerate adversarial training.

| Methods                       | Model            | Acc <sub>n</sub> | Acc <sub>r</sub> |
|-------------------------------|------------------|------------------|------------------|
| LBGAT ( $\alpha = 0$ ) Ours   | WideResNet-34-20 | <b>88.70%</b>    | <b>53.58%</b>    |
| LBGAT ( $\alpha = 6$ ) Ours   | WideResNet-34-20 | 83.61%           | <b>54.45%</b>    |
| LBGAT ( $\alpha = 0$ ) Ours   | WideResNet-34-10 | <b>88.22%</b>    | <b>52.86%</b>    |
| LBGAT ( $\alpha = 6$ ) Ours   | WideResNet-34-10 | 81.98%           | 53.14%           |
| Rice <i>et al.</i> [33] †     | WideResNet-34-20 | 85.34%           | 53.42%           |
| TRADES ( $\alpha = 1$ )       | WideResNet-34-10 | <b>88.64%</b>    | 48.11%           |
| TRADES ( $\alpha = 6$ )       | WideResNet-34-10 | 84.92%           | 52.64%           |
| Kumari <i>et al.</i> [22] †   | WideResNet-34-10 | 87.80%           | 49.12%           |
| Mao <i>et al.</i> [28] †      | WideResNet-34-10 | 86.21%           | 47.41%           |
| Zhang <i>et al.</i> [55] †*   | WideResNet-34-10 | 87.20%           | 44.83%           |
| Shafahi <i>et al.</i> [35] †* | WideResNet-34-10 | 86.11%           | 41.47%           |
| Chan <i>et al.</i> [5] †      | WideResNet-34-10 | <b>93.79%</b>    | 0.26%            |
| Wang <i>et al.</i> [45] †*    | WideResNet-28-10 | <b>92.80%</b>    | 29.35%           |
| Qin <i>et al.</i> [32] †      | WideResNet-40-8  | 86.28%           | 52.81%           |
| Chen <i>et al.</i> [8] †      | ResNet-50        | 86.04%           | 51.56%           |
| Xiao <i>et al.</i> [47] †     | DenseNet-121     | 79.28%           | 18.50%           |
| Wong <i>et al.</i> [46] †     | ResNet-18        | 83.34%           | 43.21%           |
